# Supplementary material for: SERS with Flexible β-CD@AuNP/PTFE Substrates for In Situ Detection and Identification of PAH Residues on Fruit and Vegetable Surfaces Combined with Lightweight Network
Source: MDPI journal article supplement (doi:10.3390/foods12163096), 2023-08-17
Supplement: s1 [file s1]

# SERS with Flexible $\beta$ -CD@AuNPs/PTFE Substrate for *In-situ* Detection and Identification of PAHs Residues on Fruit and vegetable Surfaces Combined with Lightweight Network

Mengqing Qiu<sup>1,2</sup>, Le Tang<sup>3</sup>, Jinghong Wang<sup>3</sup>, Qingshan Xu<sup>1</sup>, Shouguo Zheng<sup>1,4,\*</sup>, Shizhuang Weng<sup>3,\*</sup>

1-Hefei Institutes of Physical Science, Chinese Academy of Sciences, Hefei 230031, People's Republic of China

2-University of Science and Technology of China, Hefei 230026, People's Republic of China

3-National Engineering Research Center for Agro-Ecological Big Data Analysis & Application, Anhui University, Hefei 230601, People's Republic of China

4-Anhui Institute of Innovation for Industrial Technology, Hefei 230088, People's Republic of China

## Supporting information

### SEM image of the prepared $\beta$ -CD@AuNPs

The SEM image of the prepared  $\beta$ -CD@AuNPs was shown in **Figure S1 A**, the particle size is uniform.

And the particle size was calculated by using nanomeasure software based on SEM images, as shown in

**Figure S1 B**, which is about 20-25 nm.

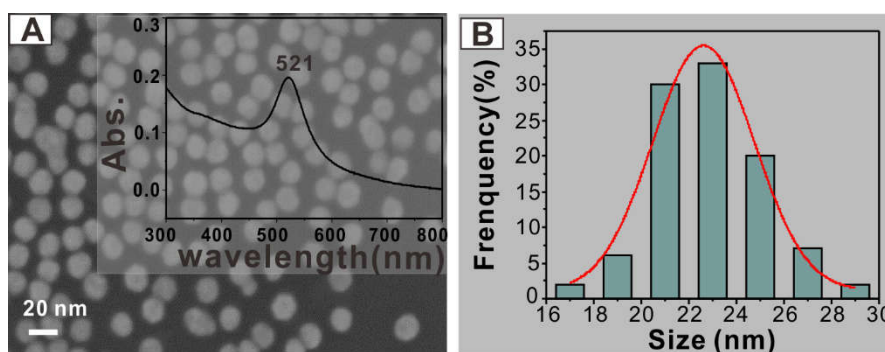

**Figure S1.** SEM image (A) and Size (B) of the prepared  $\beta$ -CD@AuNPs.

### Preparation of $\beta$ -CD@AuNPs/PTFE

The preparation process of  $\beta$ -CD@AuNPs/PTFE was shown in **Figure S2**. The concentrated 10  $\mu$ L  $\beta$ -CD@AuNPs colloidal was dropped onto the hydrophobic smooth PTFE film. As the colloidal solution evaporates, the initial droplet can be concentrated into a cell domain with a diameter of 0.5-1 mm.

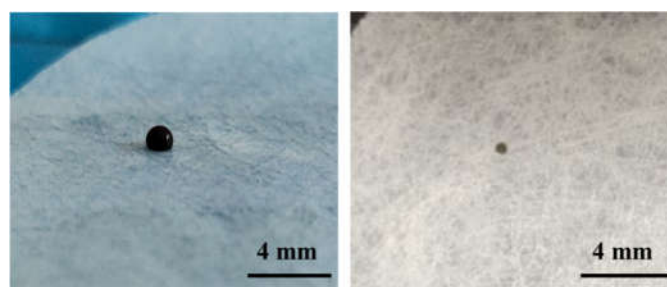

**Figure S2.** The preparation process of  $\beta$ -CD@AuNPs/PTFE.

### The structure of Lightweight deep learning network

The structures of lightweight networks such as SqueezeNet, MobileNet and ShuffleNet used in this study were shown in **Figure S3**, **Figure S4** and **Figure S5**, respectively.

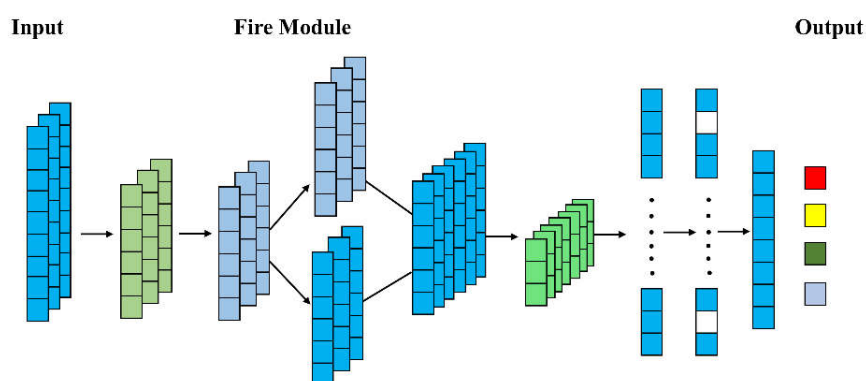

**Figure S3.** Structure of SqueezeNet.

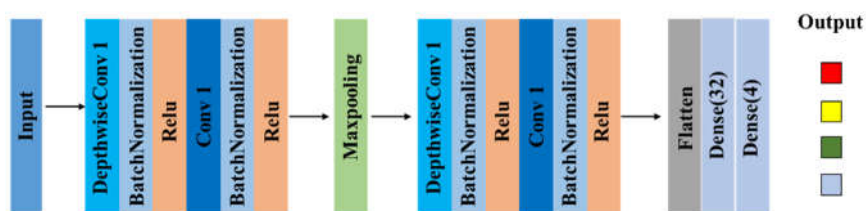

**Figure S4.** Structure of MobileNet.

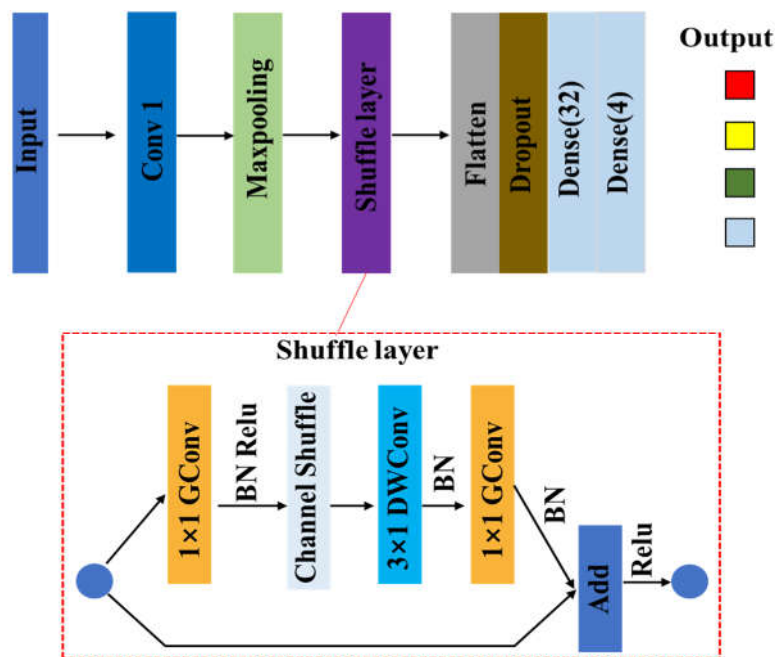

Figure S5. Structure of ShuffleNet.

#### SEM image of PTFE and $\beta$ -CD@AuNPs/PTFE

The SEM image of PTFE and  $\beta$ -CD@AuNPs/PTFE were shown in Figure S6, the gap between the nanoparticles was less than 10nm, which helps to generate hot spots.

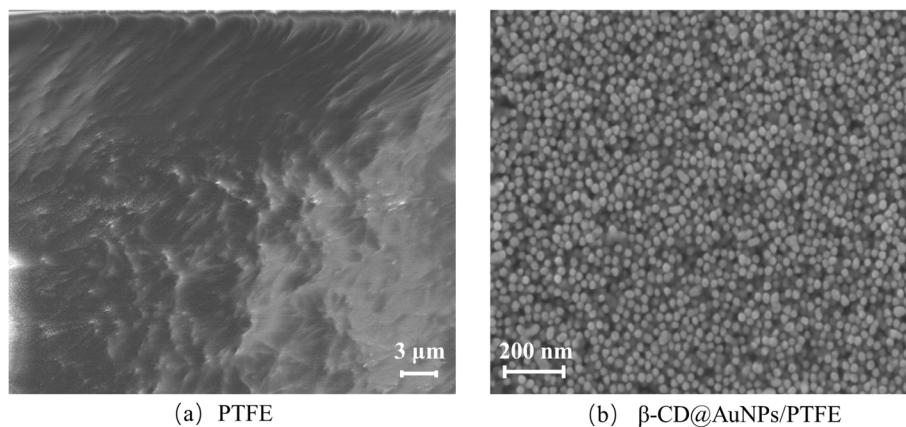

Figure S6. SEM image of (a) PTFE and (b)  $\beta$ -CD@AuNPs/PTFE.

#### The Enhancement Factor of the used SERS platform

The total SERS enhancement comprises two multiplicative contributions, the electromagnetic enhancement (EM) and the chemical enhancement (CE). The enhancement factor of SERS mainly came from the EM, it was proportional to the 4th power of the electromagnetic field intensity. And the effect of chemical enhancement was weak, generally  $10^1$ - $10^2$ . In this study, COMSOL5.6 commercial software package was used to simulate the electromagnetic field intensity of different gaps, and nanomeasurer software was used to calculate that the gap of nanoparticles in the SERS

platform was about 4 nm with  $|E/E_0|^2$  of  $1.51 \times 10^3$ , as shown in **Figure S7**. So the Enhancement  
Factor of the SERS platform was about  $10^6 \sim 10^7$ .

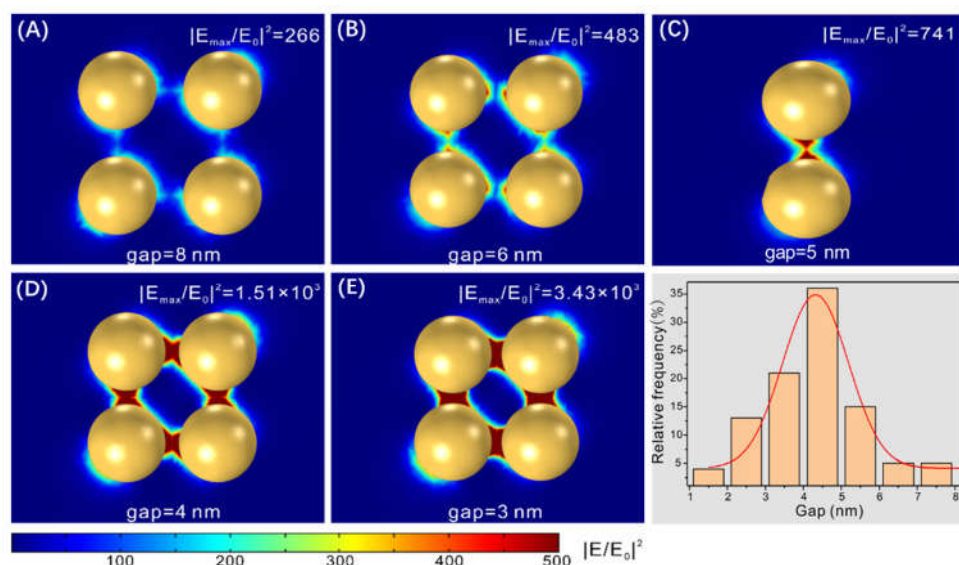

**Figure S7.** The field distribution of four AuNPs with A particle size of 24 nm with different gaps of (A) 8 nm, (B) 6 nm, (C) 5 nm, (D) 4 nm and (E) 3 nm; (F) Gap distribution of  $\beta$ -CD@AuNPs/PTFE.

## 52 Parameter setting of models

53 The parameter settings for the Squeezenet, MobileNet, ShuffleNet models are shown in **Table S1**.

54 **Table S1.** Parameter setting of different models.

| Methods           | Parameters                                                                               |
|-------------------|------------------------------------------------------------------------------------------|
| <b>Squeezenet</b> | Conv_1 (Relu) 16@3 × 1; Max-pooling_1 2 × 1                                              |
|                   | Conv_2 (Relu) 8@1 × 1;                                                                   |
|                   | Conv_3 (Relu) 12@3 × 1; Conv_4 (Relu) 12@1 × 1                                           |
|                   | Concatenate(Conv_3, Conv_4)                                                              |
|                   | Conv_5(Relu)8@3×1;                                                                       |
|                   | Flatten ; dropout(0.5); Dense 32; dense 4                                                |
|                   | optimizer: 'Adam', loss: 'categorical_crossentropy', batch_size=12, epochs=100,lr=0.0001 |
| <b>MobileNet</b>  | DepthwiseConv_1 5@1×1                                                                    |
|                   | BatchNormalization_1                                                                     |
|                   | Activation(Relu)                                                                         |
|                   | Conv_1 16@1×1                                                                            |
|                   | BatchNormalization_2                                                                     |
|                   | Activation(Relu)                                                                         |
|                   | Max-pooling_1 3×1                                                                        |
|                   | DepthwiseConv_2 5@1×1                                                                    |
|                   | BatchNormalization_3                                                                     |
|                   | Activation(Relu)                                                                         |
|                   | Conv_2 8@1×1                                                                             |
|                   | BatchNormalization_4                                                                     |
|                   | Activation(Relu)                                                                         |
|                   | Flatten; Dense 32; dense4                                                                |
|                   | optimizer: 'Adam', loss: 'categorical_crossentropy', batch_size=12, epochs=200,lr=0.0001 |
| <b>ShuffleNet</b> | Conv_1 (Relu) 16@3 × 1; Max-pooling_1 3 × 1                                              |
|                   | _group_Conv_1(64,(1,1),1,4);                                                             |
|                   | BatchNormalization_1; Activation(Relu);                                                  |
|                   | _channel_shuffle(activation, 4)                                                          |
|                   | DepthwiseConv_1 3×1                                                                      |
|                   | BatchNormalization_2;                                                                    |
|                   | _group_conv_2(64,(1,1),1,4);                                                             |
|                   | BatchNormalization_3                                                                     |
|                   | Add_1(Max-pooling_1, BatchNormalization_3)                                               |
|                   | _group_conv_3(64,(1,1),1,4);                                                             |
|                   | BatchNormalization_4; Activation(Relu);                                                  |
|                   | _channel_shuffle(activation, 4)                                                          |
|                   | DepthwiseConv_2 3×1                                                                      |
|                   | BatchNormalization_5;                                                                    |
|                   | _group_Conv_4(64,(1,1),1,4);                                                             |

---

BatchNormalization\_6  
Add\_2(add\_1, BatchNormalization\_6)  
Flatten; dropout(0.5); Dense 32; dense 4  
optimizer: 'Adam', loss: 'categorical\_crossentropy', batch\_size=12, epochs=100, lr=0.0001

---

55 batch\_size — the number of training samples sent into the network for each training.  
56 epochs — total number of training sessions for all samples.  
57 lr — learning rate.

## 58 The characteristic peak attribution of BaP, Nap and Pyr

59 The vibration mode corresponding to each obvious characteristic peak is shown in **Table S2**.

60 **Table S2.** Raman shifts of BaP, Nap and Pyr and the corresponding vibration modes

| PAHs | Raman shift( $\text{cm}^{-1}$ ) | Vibration mode                                                |
|------|---------------------------------|---------------------------------------------------------------|
| BaP  | 332、607                         | $\delta_{\text{C-C}}\delta_{\text{C-H}}$                      |
|      | 523                             | $\delta_{\text{C-C}}\delta_{\text{C-H}}\tau_{\text{C-C-C-C}}$ |
|      | 843                             | $\nu_{\text{C-C}}\nu_{\text{C-H}}$                            |
|      | 1014、1601                       | $\delta_{\text{C-H}}\nu_{\text{C-C}}$                         |
|      | 1231                            | $\delta_{\text{C-H}}$                                         |
|      | 1376                            | $\nu_{\text{C-C-C}}$                                          |
| Nap  | 505                             | $\nu_{\text{C-C}}\delta_{\text{C-C-C}}$                       |
|      | 760                             | $\nu_{\text{C-H}}$                                            |
|      | 1016、1372、1560                  | $\nu_{\text{C-C}}$                                            |
| Pyr  | 403、587                         | $\nu_{\text{C-C-C-C}}$                                        |
|      | 1056、1399                       | $\nu_{\text{C-C}}\tau_{\text{C-C-C-H}}$                       |
|      | 1233                            | $\delta_{\text{C-H}}\tau_{\text{C-C-C-H}}$                    |
|      | 1608                            | $\nu_{\text{C-C}}$                                            |

**Attention:**  $\nu$ - stretching vibration;  $\delta$ - bending vibration;  $\tau$ - twisting vibration

---
